# Supplementary material
Source: publisher site journal article supplement (https://www.dovepress.com/article/538226)
Supplement: Supplementary file 1 [file 538226%20Supplementary%20Material.docx]

**Supplementary Table 1. Resting and cough VAS pain scores at multiple time points post-surgery.**

| **Resting VAS Pain Scores** | | | | |
| --- | --- | --- | --- | --- |
| **Time Point** | **Sufentanil Group (n=74)** | **Lidocaine Group (n=70)** | **Z** | **P** |
| 6 hours after operation | 2 (1, 2) | 1 (1, 2)a | -2.795 | 0.005 |
| 12 hours after operation | 2 (2, 2.25)b | 1 (1, 2)ab | -5.277 | <0.001 |
| 24 hours after operation | 2 (1.75, 2)b | 1.5 (1, 2)ab | -3.594 | <0.001 |
| 48 hours after operation | 1 (1, 2)bcd | 1 (1, 2)bcd | -1.805 | 0.071 |
| Friedman χ², P | 79.352, <0.001 | 21.369, <0.001 |  |  |
| Time (Wald χ², P) | 181.029, <0.001 |  |  |  |
| Group (Wald χ², P) | 31.348, <0.001 |  |  |  |
| Interaction (Wald χ², P) | 22.062, <0.001 |  |  |  |

| **Cough VAS Pain Scores** | | | | |
| --- | --- | --- | --- | --- |
| **Time Point** | **Sufentanil Group (n=74)** | **Lidocaine Group (n=70)** | **Z** | **P** |
| 6 hours after operation | 2 (1, 3) | 1 (1, 2)a | -2.585 | 0.01 |
| 12 hours after operation | 3 (2, 3)b | 2 (2, 3)ab | -2.176 | 0.03 |
| 24 hours after operation | 3 (2, 4)b | 2.5 (2, 3)ab | -2.58 | 0.01 |
| 48 hours after operation | 2 (1, 2)cd | 2 (1, 2)cd | -1.135 | 0.257 |
| Friedman χ², P | 109.620, <0.001 | 103.195, <0.001 |  |  |
| Time (Wald χ², P) | 539.986, <0.001 |  |  |  |
| Group (Wald χ², P) | 9.426, 0.002 |  |  |  |
| Interaction (Wald χ², P) | 7.031, 0.071 |  |  |  |

Data are expressed as medians with interquartile ranges. 'a' indicates a statistically significant difference compared with the sufentanil group (P<0.05); 'b' indicates a statistically significant difference compared with 6 hours after operation (P<0.05); 'c' indicates a statistically significant difference compared with 12 hours after operation (P<0.05); 'd' indicates a statistically significant difference compared with 24 hours after operation (P<0.05). VAS, Visual Analogue Scale.

**Supplementary Table 2. 15-item Quality of Recovery questionnaire (QoR-15) Scores pre- and post-surgery.**

| **Time Point** | **Sufentanil Group (n=74)** | **Lidocaine Group (n=70)** | **Difference**  **(95% CI)** | **F** | **P** |
| --- | --- | --- | --- | --- | --- |
| Preoperation | 139.88 ± 3.64 | 140.71 ± 4.07 | -0.84 (-2.11, 0.43) | 1.691 | 0.196 |
| POD1 | 109.05 ± 7.50b | 114.76 ± 6.67ab | -5.70 (-8.05, -3.36) | 23.157 | <0.001 |
| POD2 | 121.58 ± 6.94bc | 126.34 ± 5.87abc | -4.76 (-6.89, -2.64) | 19.652 | <0.001 |
| F, P | 916.157, <0.001 | 612.850, <0.001 |  |  |  |
| Group (F, P) | 21.091, <0.001 |  |  |  |  |
| Time (F, P) | 1704.037, <0.001 |  |  |  |  |
| Interaction (F, P) | 13.984, <0.001 |  |  |  |  |

Data are presented as means ± standard deviation (SD). ‘a’ indicates a statistically significant difference compared with the sufentanil group (P < 0.05); ‘b’ indicates a statistically significant difference compared with the preoperation value (P < 0.05); ‘c’ indicates a statistically significant difference compared with POD1 (P < 0.05). POD, postoperative day.

**Supplementary Table 3: Inflammatory markers (IL-6, IL-8, TNF-α) pre- and post-surgery.**

| **IL-6 (ng/L)** | | | | |
| --- | --- | --- | --- | --- |
| **Time Point** | **Sufentanil Group (n=74)** | **Lidocaine Group (n=70)** | **F** | **P** |
| Preoperation | 14.01 ± 4.09 | 13.85 ± 2.74 | 0.015 | 0.903 |
| POD1 | 17.48 ± 4.25b | 14.53 ± 2.83a | 5.008 | 0.033 |
| POD2 | 14.89 ± 3.07c | 12.19 ± 2.96abc | 5.989 | 0.021 |
| F, P | 24.608, <0.001 | 5.369, 0.011 |  |  |
| Group (F, P) | 2.931, 0.098 |  |  |  |
| Time (F, P) | 18.94, <0.001 |  |  |  |
| Interaction (F, P) | 6.442, 0.003 |  |  |  |

| **IL-8 (ng/L)** | | | | |
| --- | --- | --- | --- | --- |
| **Time Point** | **Sufentanil Group (n=74)** | **Lidocaine Group (n=70)** | **F** | **P** |
| Preoperation | 564.25 ± 190.26 | 459.30 ± 96.93 | 3.623 | 0.067 |
| POD1 | 657.69 ± 175.06b | 501.34 ± 118.71a | 8.196 | 0.008 |
| POD2 | 641.88 ± 137.21b | 471.02 ± 97.11a | 15.497 | <0.001 |
| F, P | 12.136, <0.001 | 3.138, 0.06 |  |  |
| Group (F, P) | 8.639, 0.007 |  |  |  |
| Time (F, P) | 13.559, <0.001 |  |  |  |
| Interaction (F, P) | 3.428, 0.039 |  |  |  |

| **TNF-α (ng/L)** | | | | |
| --- | --- | --- | --- | --- |
| **Time Point** | **Sufentanil Group (n=74)** | **Lidocaine Group (n=70)** | **F** | **P** |
| Preoperation | 314.60 ± 69.72 | 266.60 ± 60.98 | 4.298 | 0.047 |
| POD 1 | 372.83 ± 95.49b | 287.79 ± 66.95a | 6.716 | 0.015 |
| POD 2 | 362.69 ± 77.65b | 253.40 ± 53.09ac | 12.739 | 0.001 |
| **F, P** | 12.346, <0.001 | 7.525, 0.003 |  |  |
| Group (F, P) | 7.899, 0.009 |  |  |  |
| Time (F, P) | 13.715, <0.001 |  |  |  |
| Interaction (F, P) | 7.981, 0.001 |  |  |  |

Data are presented as means ± standard deviation (SD). ‘a’ indicates a statistically significant difference compared with the sufentanil group (P < 0.05); ‘b’ indicates a statistically significant difference compared with the preoperation value (P < 0.05); ‘c’ indicates a statistically significant difference compared with POD1 (P < 0.05). POD, postoperative day.

**Supplementary Table 4: Stress hormones (cortisol, epinephrine) pre- and post-surgery.**

| **Cortisol (ng/L)** | | | | |
| --- | --- | --- | --- | --- |
| **Time Point** | **Sufentanil Group (n=74)** | **Lidocaine Group (n=70)** | **F** | **P** |
| Preoperation | 72.46 ± 11.46 | 66.83 ± 8.34 | 2.371 | 0.135 |
| POD1 | 130.85 ± 16.59b | 119.58 ± 9.56ab | 5.197 | 0.03 |
| POD2 | 120.17 ± 14.56bc | 99.63 ± 6.77abc | 24.56 | <0.001 |
| F, P | 170.028, <0.001 | 145.496, <0.001 |  |  |
| Group (F, P) | 12.009, 0.002 |  |  |  |
| Time (F, P) | 409.589, <0.001 |  |  |  |
| Interaction (F, P) | 7.043, 0.002 |  |  |  |

| **Epinephrine (ng/L)** | | | | |
| --- | --- | --- | --- | --- |
| **Time Point** | **Sufentanil Group (n=74)** | **Lidocaine Group (n=70)** | **F** | **P** |
| Preoperation | 129.21 ± 10.48 | 122.50 ± 10.21 | 3.153 | 0.087 |
| POD1 | 165.09 ± 12.22b | 155.33 ± 12.26ab | 4.768 | 0.038 |
| POD2 | 162.60 ± 11.14b | 150.79 ± 10.08ab | 9.273 | 0.005 |
| F, P | 43.033, <0.001 | 34.312, <0.001 |  |  |
| Group (F, P) | 9.562, 0.004 |  |  |  |
| Time (F, P) | 76.662, <0.001 |  |  |  |
| Interaction (F, P) | 0.683, 0.514 |  |  |  |

Data are presented as means ± standard deviation (SD). ‘a’ indicates a statistically significant difference compared with the sufentanil group (P < 0.05); ‘b’ indicates a statistically significant difference compared with the preoperation value (P < 0.05); ‘c’ indicates a statistically significant difference compared with POD1 (P < 0.05). POD, postoperative day.
